# Supplementary material for: What is the postoperative nutrition intake in children with congenital heart disease? A single-center analysis in China
Source: Springer Nature journal article supplement (doi:10.1186/s12887-022-03530-9), 2022-08-03
Supplement: MOESM2 [file 23332546]

**Additional file 2.** Use of blood and its biological products after surgery

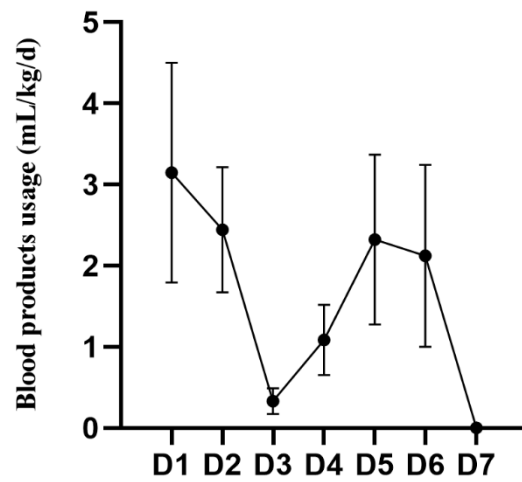

The trend of blood product use showed a trend of first decreasing, then increasing on days 4 to 5, and finally decreasing again
